# Supplementary material
Source: PubMed Central journal article supplement (PMC3530881)
Supplement: 97320630081132S1.pdf [file 97320630081132S1.pdf]

## Supplementary material:

**Table 1:** Differential expression of breast cancer genes in the two conditions

| Gene symbol | Expression in ER starved files | Expression in Tamoxifen treated files | Gene symbol | Expression in ER starved files | Expression in Tamoxifen treated files |
|-------------|--------------------------------|---------------------------------------|-------------|--------------------------------|---------------------------------------|
| AKT2        | Under-expressed                | Under-expressed                       | IGF1R       | Over-expressed                 | Mixed                                 |
| APC         | Under-expressed                | Mixed                                 | IGF2r       | Under-expressed                | Over-expressed                        |
| APS         | Under-expressed                | Not Present                           | KRAS2       | Mixed                          | Under-expressed                       |
| ATM         | Under-expressed                | Mixed                                 | MYCL1       | Under-expressed                | Mixed                                 |
| BCL2        | Over-expressed                 | Under-expressed                       | KIT         | Over-expressed                 | Over-expressed                        |
| BRCA1       | Over-expressed                 | Under-expressed                       | MCC         | Mixed                          | Over-expressed                        |
| BRCA2       | Over-expressed                 | Under-expressed                       | MDM2        | Over-expressed                 | Mixed                                 |
| CCND1       | Over-expressed                 | Under-expressed                       | MET         | Under-expressed                | Mixed                                 |
| CDKN2A      | Under-expressed                | Mixed                                 | MYC         | Under-expressed                | Over-expressed                        |
| COL18A1     | Over-expressed                 | Over-expressed                        | NF2         | Under-expressed                | Over-expressed                        |
| CTSD        | Over-expressed                 | Under-expressed                       | NME1        | Over-expressed                 | Under-expressed                       |
| DCC         | Under-expressed                | Not Present                           | NRAS        | Over-expressed                 | Mixed                                 |
| EGF         | Under-expressed                | Over-expressed                        | PGR         | Over-expressed                 | Not Present                           |
| EGFR        | Under-expressed                | Over-expressed                        | PHB         | Mixed                          | Under-expressed                       |
| EMS1        | Over-expressed                 | Not Present                           | PLG         | Over-expressed                 | Under-expressed                       |
| ERBB2       | Under-expressed                | Over-expressed                        | PLAT        | Mixed                          | Over-expressed                        |
| ERBB3       | Under-expressed                | Over-expressed                        | PRL         | Mixed                          | Under-expressed                       |
| ESR1        | Mixed                          | Under-expressed                       | PTH         | Under-expressed                | Under-expressed                       |
| MSH2        | Under-expressed                | Over-expressed                        | PTPN1       | Over-expressed                 | Under-expressed                       |
| MLH1        | Mixed                          | Under-expressed                       | PTPRF       | Mixed                          | Over-expressed                        |
| FGFR1       | Under-expressed                | Mixed                                 | RAC3        | Under-expressed                | Mixed                                 |
| FGFR2       | Under-expressed                | Under-expressed                       | SNCG        | Under-expressed                | Over-expressed                        |
| FGFR4       | Over-expressed                 | Under-expressed                       | SRC         | Mixed                          | Not Present                           |
| GRB7        | Under-expressed                | Under-expressed                       | TFAP2C      | Over-expressed                 | Under-expressed                       |
| HRAS        | Mixed                          | Over-expressed                        | TGFA        | Over-expressed                 | Over-expressed                        |
| THRA        | Under-expressed                | Over-expressed                        | TSG101      | Under-expressed                | Over-expressed                        |
| TP53        | Over-expressed                 | Under-expressed                       | PLAU        | Mixed                          | Under-expressed                       |
| VIM         | Under-expressed                | Over-expressed                        |             |                                |                                       |

**Table 2:** Significant genes with their functions and corresponding p-values

| S. No | Gene Ontology                       | Genes Responsible                                                                                                                                                                                                   | p-value  |
|-------|-------------------------------------|---------------------------------------------------------------------------------------------------------------------------------------------------------------------------------------------------------------------|----------|
| 1     | Phosphotransferase activity         | FGFR2 FGFR1 FGFR4 ERBB3 ERBB2 TRRAP KIT SRC IGF1R PTK2<br>TGFA PRKACA INSR CHUK AKT2 EGFR LYN TRIM28 MET RAF1<br>IRS1 ATM CCND1 FYN GSK3B MAPK14 IGF2R MAPK3 BUB1B JAK2<br>MAPK8                                    | 2.4E-20  |
| 2     | Receptor signaling protein activity | EGFR LYN ERBB3 ERBB2 RAF1 SMAD3 KIT IRS1 STAT3 BAG1<br>MAPK14 APS MAPK3 JAK2 SHC1 MAPK8 EGF INSR                                                                                                                    | 2.5E-19  |
| 3     | Enzyme binding                      | CAV1 TSG101 ERBB2 VIM CTNNB1 IGF1R CDKN2A BCL2 PRKACA<br>INSR RASA1 PIK3R1 APC EGFR MSH2 TP53 SMAD3 BRCA2 RB1 IRS1<br>CHUK STAT3 BRCA1 CCND1 GSK3B IGF2R MDM2 JAK2 PCAF                                             | 3.34E-18 |
| 4     | Signal transducer activity          | FGFR2 DCC FGFR1 FGFR4 THRA GRB2 ERBB3 ERBB2 KIT SRC<br>CTNNB1 PGR IGF1R PTK2 BAG1 RAC3 APS TGFA SHC1 EGF INSR<br>EGFR PTPRF LYN MET CBL CREBBP ESR1 RAF1 SMAD3 IRS1 STAT3<br>MAPK14 IGF2R MAPK3 JAK2 MAPK8 MCC GRB7 | 1.9E-12  |
| 5     | Molecular transducer                | FGFR2 DCC FGFR1 FGFR4 THRA GRB2 ERBB3 ERBB2 KIT SRC<br>CTNNB1 PGR IGF1R PTK2 BAG1 RAC3 APS TGFA SHC1 EGF INSR<br>EGFR PTPRF LYN MET CBL CREBBP ESR1 RAF1 SMAD3 IRS1 STAT3<br>MAPK14 IGF2R MAPK3 JAK2 MAPK8 MCC GRB7 | 1.6E-12  |
